# Supplementary material
Source: publisher site journal article supplement (https://www.dovepress.com/article/562352)
Supplement: Supplementary file 1 [file 562352_supplementary%20material_1.pdf]

**Supplementary Table 1** Drug concentration ranges in antimicrobial susceptibility testing

| Antibiotic              | Tested range (mg/L)                           |
|-------------------------|-----------------------------------------------|
| imipenem                | 0.06-128                                      |
| meropenem               | 0.06-128                                      |
| aztreonam               | 0.5-128                                       |
| cefazidime              | 0.125-128                                     |
| ceftriaxone/avibactam   | 0.125-128, avibactam fixed at 4               |
| cefepime                | 0.06-128                                      |
| levofloxacin            | 0.06-128                                      |
| piperacillin/tazobactam | piperacillin 0.125-256, tazobactam fixed at 4 |
| ciprofloxacin           | 0.0015-128                                    |
| polymyxin B             | 0.06-128                                      |
| amikacin                | 0.125-128                                     |

**Supplementary Table 2** *P. aeruginosa* strains isolated from environments

| Date of isolation | Related patient room | Strain ID | Detailed position                                       | ST   | CRPA |
|-------------------|----------------------|-----------|---------------------------------------------------------|------|------|
| 2022.11.7         | 1                    | E041B     | Computer keyboard and mouse                             | 207  | no   |
| 2022.11.7         | 1                    | E041G     | Sink in the patient toilet                              | 108  | no   |
| 2022.11.7         | 2                    | E043C     | Ventilator                                              | 108  | no   |
| 2022.11.7         | 4                    | E044E     | Bed rails                                               | 207  | no   |
| 2022.11.7         | 5                    | E045B     | Computer keyboard and mouse                             | 207  | no   |
| 2022.11.7         | 6                    | E046D     | Sink in the patient room doorway                        | 207  | no   |
| 2022.11.7         | 6                    | E046G     | ECU monitor, infusion pump, vaporizer and hanging tower | 207  | no   |
| 2022.11.7         | 7                    | E047B     | Computer keyboard and mouse                             | 207  | no   |
| 2022.11.7         | 7                    | E047C     | Ventilator                                              | 207  | no   |
| 2022.11.7         | 7                    | E047E     | Bed rails                                               | 207  | no   |
| 2022.11.7         | 7                    | E047F     | Operation tablet                                        | 207  | no   |
| 2022.11.7         | 8                    | E048A     | Sink in the patient room doorway                        | 773  | no   |
| 2022.11.7         | 8                    | E048D     | ECU monitor, infusion pump, vaporizer and hanging tower | 207  | no   |
| 2022.11.7         | 8                    | E048E     | Bed rails                                               | 207  | no   |
| 2022.11.7         | 10                   | E050C     | Ventilator                                              | 207  | no   |
| 2022.11.7         | 10                   | E050F     | Bed rails                                               | 108  | no   |
| 2022.11.7         | 10                   | E050G     | Bed rails                                               | 108  | no   |
| 2022.11.7         | 10                   | E050P     | Operation tablet                                        | 108  | no   |
| 2022.11.7         | 11                   | E051B     | Computer keyboard and mouse                             | 248  | no   |
| 2022.11.7         | 11                   | E051E     | Bed rails                                               | 108  | no   |
| 2022.11.7         | 11                   | E051G     | Sink in the patient toilet                              | 2740 | yes  |
| 2022.11.7         | 13                   | E053D     | ECU monitor, infusion pump, vaporizer and hanging tower | 207  | no   |
| 2022.11.7         | 14                   | E054F     | Operation tablet                                        | 155  | no   |
| 2022.11.7         | 15                   | E055E     | Bed rails                                               | 207  | no   |
| 2022.11.7         | 16                   | E056B     | Computer keyboard and mouse                             | 108  | no   |
| 2022.11.7         | 16                   | E056C     | Ventilator                                              | 108  | no   |
| 2022.11.7         | 16                   | E056D     | ECU monitor, infusion pump, vaporizer and hanging tower | 108  | no   |
| 2022.11.7         | 16                   | E056E     | Bed rails                                               | 108  | no   |
| 2022.11.7         | 16                   | E056F     | Operation tablet                                        | 108  | no   |
| 2022.11.7         | 17                   | E057A     | Sink in the patient room doorway                        | 108  | no   |
| 2022.11.7         | 17                   | E057C     | Ventilator                                              | 108  | no   |
| 2022.11.7         | 17                   | E057D     | ECU monitor, infusion pump, vaporizer and hanging tower | 108  | no   |
| 2022.11.7         | 17                   | E057E     | Bed rails                                               | 108  | no   |
| 2022.11.7         | 18                   | E058A     | Sink in the patient room doorway                        | 108  | no   |
| 2022.11.7         | 18                   | E058D     | ECU monitor, infusion pump, vaporizer and hanging tower | 108  | no   |
| 2022.11.21        | 1                    | E060A     | Sink in the patient room doorway                        | 671  | no   |
| 2022.11.21        | 5                    | E063B     | Computer keyboard and mouse                             | 1051 | no   |
| 2022.11.21        | 4                    | E064A     | Sink in the patient room doorway                        | 344  | yes  |
| 2022.11.21        | 4                    | E064C     | Ventilator                                              | 155  | no   |
| 2022.11.21        | 4                    | E064D     | ECU monitor, infusion pump, vaporizer and hanging tower | 155  | no   |
| 2022.11.21        | 4                    | E064E     | Bed rails                                               | 4455 | no   |
| 2022.11.21        | 5                    | E065A     | Sink in the patient room doorway                        | 274  | no   |
| 2022.11.21        | 5                    | E065C     | Ventilator                                              | 155  | no   |
| 2022.11.21        | 5                    | E065D     | ECU monitor, infusion pump, vaporizer and hanging tower | 155  | no   |
| 2022.11.21        | 5                    | E065E     | Bed rails                                               | 274  | no   |
| 2022.11.21        | 5                    | E065F     | Operation tablet                                        | 810  | no   |
| 2022.11.21        | 7                    | E067B     | Computer keyboard and mouse                             | 810  | no   |
| 2022.11.21        | 7                    | E067E     | Bed rails                                               | 274  | no   |
| 2022.11.21        | 8                    | E068A     | Sink in the patient room doorway                        | 671  | no   |
| 2022.11.21        | 8                    | E068F     | Operation tablet                                        | 1021 | yes  |
| 2022.11.21        | 8                    | E068G     | Sink in the patient toilet                              | 1021 | yes  |
| 2022.11.21        | 9                    | E069A     | Sink in the patient room doorway                        | 155  | no   |
| 2022.11.21        | 10                   | E070B     | Bed rails                                               | 155  | no   |
| 2022.11.21        | 11                   | E071A     | Sink in the patient room doorway                        | 348  | no   |
| 2022.11.21        | 11                   | E071C     | Sink in the patient toilet                              | 2740 | yes  |
| 2022.11.21        | 12                   | E072A     | Sink in the patient room doorway                        | 671  | no   |
| 2022.11.21        | 13                   | E073A     | Sink in the patient room doorway                        | 1051 | no   |
| 2022.11.21        | 14                   | E074D     | ECU monitor, infusion pump, vaporizer and hanging tower | 274  | no   |
| 2022.11.21        | 14                   | E074F     | Operation tablet                                        | 810  | no   |
| 2022.11.21        | 15                   | E075A     | Sink in the patient room doorway                        | 671  | no   |
| 2022.11.21        | 15                   | E075E     | Bed rails                                               | 671  | no   |
| 2022.11.21        | 16                   | E076A     | Sink in the patient room doorway                        | 671  | no   |
| 2022.11.21        | 16                   | E076B     | Computer keyboard and mouse                             | 671  | no   |
| 2022.11.21        | 16                   | E076D     | ECU monitor, infusion pump, vaporizer and hanging tower | 810  | no   |
| 2022.11.21        | 17                   | E077A     | Sink in the patient room doorway                        | 108  | no   |
| 2022.11.21        | 17                   | E077D     | ECU monitor, infusion pump, vaporizer and hanging tower | 155  | no   |
| 2022.11.21        | 17                   | E077F     | Operation tablet                                        | 155  | no   |
| 2022.12.5         | 4                    | E084A     | Sink in the patient room doorway                        | 671  | no   |
| 2022.12.5         | 4                    | E084E     | Bed rails                                               | 671  | no   |
| 2022.12.5         | 4                    | E084F     | Operation tablet                                        | 671  | no   |
| 2022.12.5         | 5                    | E085A     | Sink in the patient room doorway                        | 274  | no   |
| 2022.12.5         | 5                    | E085B     | Computer keyboard and mouse                             | 274  | no   |
| 2022.12.5         | 5                    | E085C     | Ventilator                                              | 274  | no   |
| 2022.12.5         | 5                    | E085D     | ECU monitor, infusion pump, vaporizer and hanging tower | 671  | no   |
| 2022.12.5         | 6                    | E086G     | Sink in the patient toilet                              | 207  | no   |
| 2022.12.5         | 6                    | E086H     | Sink in the patient room doorway                        | 207  | no   |
| 2022.12.5         | 7                    | E087B     | Computer keyboard and mouse                             | 207  | no   |
| 2022.12.5         | 7                    | E087C     | Ventilator                                              | 207  | no   |
| 2022.12.5         | 7                    | E088G     | Sink in the patient toilet                              | 207  | no   |
| 2022.12.5         | 9                    | E089A     | Sink in the patient room doorway                        | 671  | no   |
| 2022.12.5         | 9                    | E089B     | Computer keyboard and mouse                             | 207  | no   |
| 2022.12.5         | 9                    | E089C     | Ventilator                                              | 671  | no   |
| 2022.12.5         | 9                    | E089F     | Operation tablet                                        | 671  | no   |
| 2022.12.5         | 10                   | E090H     | ECU monitor, infusion pump, vaporizer and hanging tower | 671  | no   |
| 2022.12.5         | 10                   | E090I     | Bed rails                                               | 671  | no   |
| 2022.12.5         | 10                   | E090O     | Bed rails                                               | 671  | no   |
| 2022.12.5         | 11                   | E091A     | Sink in the patient room doorway                        | 234  | no   |
| 2022.12.5         | 11                   | E091B     | Computer keyboard and mouse                             | 671  | no   |
| 2022.12.5         | 11                   | E091C     | Ventilator                                              | 671  | no   |
| 2022.12.5         | 11                   | E091G     | Sink in the patient toilet                              | 671  | no   |
| 2022.12.5         | 12                   | E092A     | Sink in the patient room doorway                        | 671  | no   |
| 2022.12.5         | 12                   | E092C     | Ventilator                                              | 671  | no   |
| 2022.12.5         | 12                   | E092D     | ECU monitor, infusion pump, vaporizer and hanging tower | 671  | no   |
| 2022.12.5         | 12                   | E092E     | Bed rails                                               | 671  | no   |
| 2022.12.5         | 12                   | E092F     | Operation tablet                                        | 671  | no   |
| 2022.12.5         | 13                   | E093A     | Sink in the patient room doorway                        | 671  | no   |
| 2022.12.5         | 13                   | E093E     | Bed rails                                               | 671  | no   |
| 2022.12.5         | 14                   | E094A     | Sink in the patient room doorway                        | 671  | no   |
| 2022.12.5         | 14                   | E094B     | Computer keyboard and mouse                             | 671  | no   |
| 2022.12.5         | 14                   | E094C     | Ventilator                                              | 671  | no   |
| 2022.12.5         | 15                   | E095G     | Sink in the patient toilet                              | 108  | no   |
| 2022.12.5         | 16                   | E096A     | Sink in the patient room doorway                        | 671  | no   |
| 2022.12.5         | 16                   | E096F     | Operation tablet                                        | 4455 | no   |
| 2022.12.5         | 17                   | E097A     | Sink in the patient room doorway                        | 108  | no   |
| 2022.12.5         | 18                   | E098A     | Sink in the patient room doorway                        | 108  | no   |
| 2022.12.19        | 1                    | E101G     | Sink in the patient toilet                              | 108  | no   |
| 2022.12.19        | 1                    | E105A     | Sink in the patient room doorway                        | 671  | no   |
| 2022.12.19        | 4                    | E104E     | Bed rails                                               | 4455 | no   |
| 2022.12.19        | 5                    | E105A     | Sink in the patient room doorway                        | 274  | no   |
| 2022.12.19        | 6                    | E106D     | ECU monitor, infusion pump, vaporizer and hanging tower | 316  | yes  |
| 2022.12.19        | 6                    | E106E     | Bed rails                                               | 316  | yes  |
| 2022.12.19        | 8                    | E108A     | Sink in the patient room doorway                        | 671  | no   |
| 2022.12.19        | 11A                  | E111A     | Sink in the patient room doorway                        | 234  | no   |
| 2022.12.19        | 13                   | E113A     | Sink in the patient room doorway                        | 1051 | no   |
| 2022.12.19        | 14                   | E114A     | Sink in the patient room doorway                        | 252  | no   |
| 2022.12.19        | 15                   | E115A     | Sink in the patient room doorway                        | 348  | no   |
| 2022.12.19        | 16                   | E116A     | Sink in the patient room doorway                        | 671  | no   |
| 2022.12.19        | 18                   | E116A     | Sink in the patient room doorway                        | 108  | no   |
| 2023.1.16         | 8                    | E127A     | Sink in the patient toilet                              | 108  | no   |
| 2023.1.16         | 7                    | E127A     | Sink in the patient room doorway                        | 348  | no   |
| 2023.1.16         | 8                    | E128A     | Sink in the patient room doorway                        | 273  | no   |
| 2023.1.16         | 1                    | E131A     | Sink in the patient room doorway                        | 234  | no   |
| 2023.1.16         | 11                   | E131D     | ECU monitor, infusion pump, vaporizer and hanging tower | 463  | yes  |
| 2023.1.16         | 13                   | E133A     | Sink in the patient room doorway                        | 1051 | no   |
| 2023.1.16         | 16                   | E136D     | ECU monitor, infusion pump, vaporizer and hanging tower | 1262 | yes  |
| 2023.1.16         | 18                   | E138A     | Sink in the patient room doorway                        | 108  | no   |
| 2023.1.30         | 5                    | E145A     | Sink in the patient room doorway                        | 671  | no   |
| 2023.1.30         | 5                    | E145A     | Sink in the patient room doorway                        | 244  | no   |
| 2023.1.30         | 6                    | E146A     | Sink in the patient room doorway                        | 207  | no   |
| 2023.1.30         | 6                    | E147D     | ECU monitor, infusion pump, vaporizer and hanging tower | 463  | no   |
| 2023.1.30         | 8                    | E148A     | Sink in the patient room doorway                        | 671  | no   |
| 2023.1.30         | 8                    | E148C     | Sink in the patient toilet                              | 273  | no   |
| 2023.1.30         | 9                    | E149A     | Sink in the patient room doorway                        | 671  | no   |
| 2023.1.30         | 11                   | E151A     | Sink in the patient room doorway                        | 671  | no   |
| 2023.1.30         | 11                   | E151G     | Sink in the patient toilet                              | 463  | yes  |
| 2023.1.30         | 12                   | E152A     | Sink in the patient room doorway                        | 671  | no   |
| 2023.1.30         | 12                   | E152B     | Computer keyboard and mouse                             | 671  | no   |
| 2023.1.30         | 13                   | E153A     | Sink in the patient room doorway                        | 1051 | no   |
| 2023.1.30         | 15                   | E155C     | Ventilator                                              | 463  | yes  |
| 2023.1.30         | 15                   | E155D     | ECU monitor, infusion pump, vaporizer and hanging tower | 463  | yes  |
| 2023.1.30         | 15                   | E155E     | Bed rails                                               | 463  | yes  |
| 2023.1.30         | 15                   | E155G     | Sink in the patient toilet                              | 463  | yes  |
| 2023.1.30         | 16A                  | E156A     | Sink in the patient room doorway                        | 671  | no   |
| 2023.1.30         | 18                   | E158A     | Sink in the patient room doorway                        | 108  | no   |
| 2023.1.30         | Nurse station        | E160B     | Sink in the patient room doorway                        | 244  | no   |
| 2023.2.13         |                      | E163A     | Sink in the patient room doorway                        | 671  | no   |
| 2023.2.13         |                      | E165A     | Sink in the patient room doorway                        | 463  | yes  |
| 2023.2.13         | 5                    | E165B     | Computer keyboard and mouse                             | 463  | yes  |
| 2023.2.13         | 5                    | E165F     | Operation tablet                                        | 463  | yes  |
| 2023.2.13         | 6                    | E166A     | Sink in the patient room doorway                        | 207  | no   |
| 2023.2.13         | 7                    | E167A     | Sink in the patient room doorway                        | 671  | no   |
| 2023.2.13         | 9                    | E167C     | Ventilator                                              | 463  | yes  |
| 2023.2.13         | 9                    | E169A     | Sink in the patient room doorway                        | 244  | no   |
| 2023.2.13         | 9                    | E169B     | Computer keyboard and mouse                             | 463  | yes  |
| 2023.2.13         | 10                   | E170I     | Bed rails                                               | 1601 | no   |
| 2023.2.13         | 10                   | E170M     | Operation tablet                                        | 1601 | no   |
| 2023.2.13         | 10                   | E170O     | Bed rails                                               | 1601 | no   |
| 2023.2.13         | 11                   | E171A     | Sink in the patient room doorway                        | 671  | no   |
| 2023.2.13         | 11                   | E171G     | Sink in the patient toilet                              | 463  | yes  |
| 2023.2.13         | 12                   | E172A     | Sink in the patient room doorway                        | 671  | no   |
| 2023.2.13         | 13                   | E173A     | Sink in the patient room doorway                        | 1051 | no   |
| 2023.2.13         | 13                   | E173G     | Sink in the patient toilet                              | 108  | no   |

|           |               |       |                                                         |      |     |
|-----------|---------------|-------|---------------------------------------------------------|------|-----|
| 2023.2.13 | 14            | E174A | Sink in the patient room doorway                        | 155  | no  |
| 2023.2.13 | 15            | E175A | Sink in the patient room doorway                        | 671  | no  |
| 2023.2.13 | 16            | E176A | Sink in the patient room doorway                        | 671  | no  |
| 2023.2.13 | 17            | E177A | Sink in the patient room doorway                        | 108  | no  |
| 2023.2.13 | 17            | E177C | Ventilator                                              | 2069 | no  |
| 2023.2.13 | 18            | E178A | Sink in the patient room doorway                        | 463  | yes |
| 2023.2.13 | 18            | E178E | Bed rails                                               | 463  | yes |
| 2023.2.13 | 18            | E178F | Operation tabletop                                      | 463  | yes |
| 2023.2.13 | 19            | E179F | Operation tabletop                                      | 463  | yes |
| 2023.2.13 | Nurse station | E180B | Sink                                                    | 244  | no  |
| 2023.2.27 | 0             | E181G | Sink in the patient toilet                              | 108  | no  |
| 2023.2.27 | 0             | E183A | Sink in the patient room doorway                        | 671  | yes |
| 2023.2.27 | 0             | E185A | Sink in the patient room doorway                        | 671  | yes |
| 2023.2.27 | 0             | E185D | ECU monitor, infusion pump, vaporizer and hanging tower | 1596 | no  |
| 2023.2.27 | 6             | E186G | Sink in the patient toilet                              | 207  | yes |
| 2023.2.27 | 6             | E187A | Sink in the patient room doorway                        | 671  | no  |
| 2023.2.27 | 8             | E188A | Sink in the patient room doorway                        | 671  | no  |
| 2023.2.27 | 8             | E188G | Sink in the patient toilet                              | 1021 | no  |
| 2023.2.27 | 9             | E189A | Sink in the patient room doorway                        | 671  | no  |
| 2023.2.27 | 10            | E190I | Bed rails                                               | 1601 | no  |
| 2023.2.27 | 11            | E191A | Sink in the patient room doorway                        | 234  | yes |
| 2023.2.27 | 12            | E192A | Sink in the patient room doorway                        | 671  | yes |
| 2023.2.27 | 13            | E193A | Sink in the patient room doorway                        | 1051 | no  |
| 2023.2.27 | 14            | E196A | Sink in the patient room doorway                        | 155  | no  |
| 2023.2.27 | 15            | E195A | Sink in the patient room doorway                        | 671  | no  |
| 2023.2.27 | 16            | E196A | Sink in the patient room doorway                        | 671  | no  |
| 2023.2.27 | 17            | E197A | Sink in the patient room doorway                        | 206  | no  |
| 2023.2.27 | 17            | E197E | Bed rails                                               | 463  | yes |
| 2023.2.27 | 18            | E198A | Sink in the patient room doorway                        | 244  | no  |
| 2023.3.13 | 1             | E201G | Sink in the patient toilet                              | 108  | no  |
| 2023.3.13 | 1             | E203A | Sink in the patient room doorway                        | 671  | no  |
| 2023.3.13 | 5             | E205A | Sink in the patient room doorway                        | 671  | no  |
| 2023.3.13 | 12            | E206A | Sink in the patient room doorway                        | 207  | no  |
| 2023.3.13 | 8             | E208A | Sink in the patient room doorway                        | 671  | no  |
| 2023.3.13 | 10            | E209A | Sink in the patient room doorway                        | 671  | no  |
| 2023.3.13 | 12            | E210A | Sink in the patient room doorway                        | 671  | no  |
| 2023.3.13 | 12            | E212A | Sink in the patient room doorway                        | 671  | no  |
| 2023.3.13 | 13            | E213A | Sink in the patient room doorway                        | 1051 | no  |
| 2023.3.13 | 14            | E214A | Sink in the patient room doorway                        | 245  | no  |
| 2023.3.13 | 15            | E215A | Sink in the patient room doorway                        | 671  | no  |
| 2023.3.13 | 16            | E216A | Sink in the patient room doorway                        | 671  | no  |
| 2023.3.13 | 17            | E217A | ECU monitor, infusion pump, vaporizer and hanging tower | 1440 | yes |
| 2023.3.13 | 17            | E217A | Sink in the patient room doorway                        | 108  | no  |
| 2023.3.13 | Nurse station | E220B | Sink                                                    | 244  | no  |
| 2023.3.27 | 0             | E222D | ECU monitor, infusion pump, vaporizer and hanging tower | 463  | yes |
| 2023.3.27 | 0             | E223A | Sink in the patient room doorway                        | 671  | no  |
| 2023.3.27 | 0             | E225A | Sink in the patient room doorway                        | 671  | no  |
| 2023.3.27 | 0             | E226A | Sink in the patient room doorway                        | 6    | no  |
| 2023.3.27 | 0             | E228A | Sink in the patient room doorway                        | 671  | no  |
| 2023.3.27 | 0             | E229A | Sink in the patient room doorway                        | 671  | no  |
| 2023.3.27 | 11            | E231A | Sink in the patient room doorway                        | 463  | yes |
| 2023.3.27 | 11            | E231D | ECU monitor, infusion pump, vaporizer and hanging tower | 1076 | yes |
| 2023.3.27 | 11            | E231G | Sink in the patient toilet                              | 1076 | yes |
| 2023.3.27 | 12            | E232A | Sink in the patient room doorway                        | 671  | no  |
| 2023.3.27 | 13            | E233A | Sink in the patient room doorway                        | 1051 | no  |
| 2023.3.27 | 14            | E234A | Sink in the patient room doorway                        | 155  | no  |
| 2023.3.27 | 15            | E235A | Sink in the patient room doorway                        | 671  | no  |
| 2023.3.27 | 16            | E236A | Sink in the patient room doorway                        | 671  | no  |
| 2023.3.27 | 17            | E237A | Sink in the patient room doorway                        | 108  | no  |
| 2023.3.27 | 18            | E238A | Sink in the patient room doorway                        | 17   | no  |
| 2023.3.27 | Nurse station | E240B | Sink                                                    | 244  | no  |
| 2023.4.0  | 2             | E242D | ECU monitor, infusion pump, vaporizer and hanging tower | 463  | yes |
| 2023.4.0  | 2             | E245A | Sink in the patient room doorway                        | 244  | no  |
| 2023.4.0  | 6             | E246A | Sink in the patient room doorway                        | 207  | no  |
| 2023.4.0  | 6             | E247B | Communitarian keyboard and mouse                        | 207  | no  |
| 2023.4.0  | 8             | E248A | Sink in the patient room doorway                        | 671  | no  |
| 2023.4.0  | 8             | E248G | Sink in the patient toilet                              | 1021 | no  |
| 2023.4.0  | 10            | E249A | Sink in the patient room doorway                        | 671  | no  |
| 2023.4.0  | 11            | E251A | Sink in the patient room doorway                        | 234  | no  |
| 2023.4.0  | 12            | E252A | Sink in the patient room doorway                        | 671  | no  |
| 2023.4.0  | 13            | E253A | Sink in the patient room doorway                        | 108  | no  |
| 2023.4.0  | 14            | E254A | Sink in the patient room doorway                        | 155  | no  |
| 2023.4.0  | 15            | E255A | Sink in the patient room doorway                        | 671  | no  |
| 2023.4.0  | 15            | E255E | Bed rails                                               | 1601 | no  |
| 2023.4.0  | 15            | E255G | ECU monitor, infusion pump, vaporizer and hanging tower | 1601 | no  |
| 2023.4.0  | 15            | E255F | Bed rails                                               | 1601 | no  |
| 2023.4.0  | 16            | E256A | Sink in the patient room doorway                        | 671  | no  |
| 2023.4.0  | 17            | E257A | Sink in the patient room doorway                        | 108  | no  |
| 2023.4.0  | 18            | E258A | Sink in the patient room doorway                        | 671  | no  |
| 2023.4.27 | 2             | E262E | Bed rails                                               | 4455 | yes |
| 2023.4.27 | 3             | E263A | Sink in the patient room doorway                        | 671  | yes |
| 2023.4.27 | 4             | E264A | Sink in the patient room doorway                        | 1196 | no  |
| 2023.4.27 | 6             | E266A | Sink in the patient room doorway                        | 207  | no  |
| 2023.4.27 | 7             | E267A | Sink in the patient room doorway                        | 463  | yes |
| 2023.4.27 | 9             | E269A | Sink in the patient room doorway                        | 671  | no  |
| 2023.4.27 | 11            | E271A | Sink in the patient room doorway                        | 463  | yes |
| 2023.4.27 | 12            | E272A | Sink in the patient room doorway                        | 671  | no  |
| 2023.4.27 | 13            | E273A | Sink in the patient room doorway                        | 1051 | no  |
| 2023.4.27 | 14            | E274A | Sink in the patient room doorway                        | 810  | no  |
| 2023.4.27 | 15            | E275A | Sink in the patient room doorway                        | 244  | no  |
| 2023.4.27 | 15            | E275G | Sink in the patient toilet                              | 1601 | no  |
| 2023.4.27 | 16            | E276A | Sink in the patient room doorway                        | 671  | no  |
| 2023.4.27 | 17            | E277A | Sink in the patient room doorway                        | 108  | no  |
| 2023.4.27 | 18            | E278A | Sink in the patient room doorway                        | 671  | no  |
| 2023.4.27 | 19            | E279D | ECU monitor, infusion pump, vaporizer and hanging tower | 1601 | no  |
| 2023.4.27 | 19            | E279E | Bed rails                                               | 1601 | no  |
| 2023.4.27 | 19            | E279F | Operation tabletop                                      | 1601 | no  |
| 2023.4.27 | Nurse station | E280B | Sink                                                    | 244  | yes |

Supplementary Table 3 P. aeruginosa strains isolated from patients

| Patient ID | Age | Length of stay in ICU (days) | Sex    | Outcome       | Covid-19 pneumonia | Clinical P. aeruginosa infection | Main diagnosis                 | Strain ID | ST   | CRPA | Time of isolation | Isolation position  |
|------------|-----|------------------------------|--------|---------------|--------------------|----------------------------------|--------------------------------|-----------|------|------|-------------------|---------------------|
| 261        | 84  | 24                           | male   | deterioration | no                 | yes                              | respiratory failure            | P263E     | 314  | Yes  | 2023.2.27         | nanopharyngeal swab |
|            |     |                              |        |               |                    |                                  |                                | P263F     | 314  | No   | 2023.4.27         | rectal swab         |
|            |     |                              |        |               |                    |                                  |                                | P234E     | 314  | No   | 2023.3.27         | nanopharyngeal swab |
| 012        | 65  | 19                           | female | amelioration  | no                 | yes                              | sepsis                         | P012D     | 463  | Yes  | 2022.11.17        | rectal swab         |
| 031        | 59  | 37                           | male   | amelioration  | no                 | no                               | cardio-cerebrovascular disease | P031E     | 2140 | No   | 2023.3.13         | nanopharyngeal swab |
|            |     |                              |        |               |                    |                                  |                                | P238E     | 2140 | No   | 2023.2.27         | nanopharyngeal swab |
|            |     |                              |        |               |                    |                                  |                                | P238F     | 2140 | No   | 2023.3.27         | rectal swab         |
| 044        | 69  | 5                            | female | amelioration  | no                 | no                               | cardio-cerebrovascular disease | P044C     | 675  | No   | 2022.11.8         | nanopharyngeal swab |
| 186        | 88  | 24                           | male   | deterioration | yes                | yes                              | pneumonia                      | P186F     | 463  | Yes  | 2023.3.30         | nanopharyngeal swab |
|            |     |                              |        |               |                    |                                  |                                | P159F     | 463  | Yes  | 2023.1.30         | nanopharyngeal swab |
|            |     |                              |        |               |                    |                                  |                                | P159F     | 463  | Yes  | 2023.1.30         | rectal swab         |
| 033        | 59  | 2                            | male   | amelioration  | no                 | no                               | digestive tract hemorrhage     | P033B     | 277  | No   | 2022.11.4         | rectal swab         |
| 284        | 78  | 10                           | female | amelioration  | no                 | no                               | cardio-cerebrovascular disease | P284E     | 1601 | No   | 2023.10           | nanopharyngeal swab |
| 027        | 67  | 2                            | male   | amelioration  | no                 | no                               | cholecystopancreatic disease   | P027E     | 463  | Yes  | 2022.11.2         | rectal swab         |
|            |     |                              |        |               |                    |                                  |                                | P027D     | 463  | Yes  | 2022.11.2         | rectal swab         |
| 143        | 86  | 15                           | male   | amelioration  | no                 | no                               | rectal cancer                  | P143D     | 2711 | No   | 2022.12.18        | rectal swab         |
| 072        | 65  | 2                            | female | amelioration  | no                 | no                               | nasopharyngeal cancer          | P072D     | 1646 | No   | 2022.11.9         | rectal swab         |
| 190        | 68  | 20                           | male   | amelioration  | no                 | yes                              | pneumonia                      | P190F     | 2069 | No   | 2023.3.13         | nanopharyngeal swab |
|            |     |                              |        |               |                    |                                  |                                | P176F     | 2069 | No   | 2023.1.15         | rectal swab         |
|            |     |                              |        |               |                    |                                  |                                | P190C     | 2069 | Yes  | 2023.2.21         | rectal swab         |
| 194        | 83  | 24                           | male   | amelioration  | no                 | no                               | cardio-cerebrovascular disease | P194F     | 463  | Yes  | 2023.2.13         | rectal swab         |
| 001        | 86  | 15                           | male   | deterioration | no                 | yes                              | craniocerebral injury          | P001B     | 168  | Yes  | 2022.11.12        | nanopharyngeal swab |
|            |     |                              |        |               |                    |                                  |                                | P001C     | 463  | Yes  | 2022.11.12        | nanopharyngeal swab |
| 289        | 71  | 2                            | male   | amelioration  | no                 | no                               | cardio-cerebrovascular disease | P089F     | 168  | No   | 2022.11.29        | rectal swab         |
| 181        | 73  | 24                           | female | amelioration  | yes                | no                               | Gaillain-Barré syndrome        | P181F     | 1601 | No   | 2023.3.30         | rectal swab         |
| 230        | 80  | 38                           | male   | amelioration  | no                 | no                               | cardio-cerebrovascular disease | P230D     | 1396 | No   | 2023.20           | rectal swab         |
| 104        | 84  | 30                           | male   | death         | no                 | no                               | sepsis                         | P002F     | 381  | No   | 2022.12.5         | rectal swab         |
|            |     |                              |        |               |                    |                                  |                                | P104A     | 381  | No   | 2022.11.29        | nanopharyngeal swab |
|            |     |                              |        |               |                    |                                  |                                | P110B     | 381  | Yes  | 2022.11.29        | rectal swab         |
|            |     |                              |        |               |                    |                                  |                                | P110C     | 381  | Yes  | 2022.11.29        | rectal swab         |
| 291        | 75  | 30                           | female | amelioration  | no                 | yes                              | cholecystopancreatic disease   | P291A     | 244  | Yes  | 2023.2.24         | nanopharyngeal swab |
|            |     |                              |        |               |                    |                                  |                                | P291B     | 244  | Yes  | 2023.2.24         | rectal swab         |
|            |     |                              |        |               |                    |                                  |                                | P291C     | 244  | Yes  | 2023.2.24         | nanopharyngeal swab |
|            |     |                              |        |               |                    |                                  |                                | P291D     | 244  | Yes  | 2023.2.29         | rectal swab         |
| 133        | 53  | 50                           | male   | amelioration  | no                 | yes                              | cholecystopancreatic disease   | P133E     | 463  | Yes  | 2022.11.9         | nanopharyngeal swab |
|            |     |                              |        |               |                    |                                  |                                | P133E     | 463  | Yes  | 2023.1.16         | nanopharyngeal swab |
|            |     |                              |        |               |                    |                                  |                                | P133D     | 463  | Yes  | 2023.1.16         | rectal swab         |
| 347        | 57  | 2                            | male   | amelioration  | no                 | no                               | renal cancer                   | P347B     | 774  | No   | 2023.10           | rectal swab         |
| 286        | 81  | 7                            | male   | amelioration  | no                 | no                               | stomach cancer                 | P286B     | 1076 | No   | 2023.6            | rectal swab         |
| 273        | 69  | 30                           | female | deterioration | no                 | yes                              | cholecystopancreatic disease   | P273A     | 245  | No   | 2023.4.9          | nanopharyngeal swab |
| 206        | 63  | 69                           | male   | deterioration | no                 | no                               | sepsis                         | P206A     | 1601 | No   | 2023.7            | nanopharyngeal swab |
| 076        | 77  | 25                           | male   | deterioration | no                 | no                               | cholecystopancreatic disease   | P076D     | 270  | No   | 2022.12.12        | rectal swab         |
|            |     |                              |        |               |                    |                                  |                                | P083F     | 270  | No   | 2022.12.5         | rectal swab         |
| 221        | 52  | 39                           | male   | deterioration | no                 | no                               | meningitis                     | P185E     | 1596 | Yes  | 2023.2.27         | nanopharyngeal swab |
|            |     |                              |        |               |                    |                                  |                                | P185F     | 1596 | Yes  | 2023.2.27         | rectal swab         |
|            |     |                              |        |               |                    |                                  |                                | P224C     | 1596 | Yes  | 2023.1.6          | nanopharyngeal swab |
|            |     |                              |        |               |                    |                                  |                                | P221D     | 1596 | Yes  | 2023.3.6          | rectal swab         |
| 016        | 78  | 20                           | male   | deterioration | no                 | yes                              | sepsis                         | P016B     | 532  | No   | 2022.10.29        | rectal swab         |
|            |     |                              |        |               |                    |                                  |                                | P047E     | 532  | No   | 2022.11.7         | nanopharyngeal swab |
|            |     |                              |        |               |                    |                                  |                                | P047F     | 532  | No   | 2022.11.7         | rectal swab         |
|            |     |                              |        |               |                    |                                  |                                | P096F     | 532  | No   | 2022.12.5         | nanopharyngeal swab |
|            |     |                              |        |               |                    |                                  |                                | P096E     | 532  | No   | 2022.12.5         | rectal swab         |
|            |     |                              |        |               |                    |                                  |                                | P108A     | 532  | No   | 2022.11.29        | nanopharyngeal swab |
|            |     |                              |        |               |                    |                                  |                                | P108B     | 532  | No   | 2022.11.29        | rectal swab         |
|            |     |                              |        |               |                    |                                  |                                | P108C     | 532  | No   | 2022.12.12        | nanopharyngeal swab |
|            |     |                              |        |               |                    |                                  |                                | P108D     | 532  | No   | 2022.12.12        | rectal swab         |
| 174        | 79  | 10                           | female | deterioration | no                 | yes                              | meningitis                     | P174C     | 1663 | Yes  | 2023.1.26         | nanopharyngeal swab |
| 178        | 71  | 10                           | male   | deterioration | yes                | no                               | meningitis                     | P178B     | 1262 | No   | 2023.1.26         | rectal swab         |
| 306        | 60  | 2                            | female | amelioration  | no                 | no                               | rectal cancer                  | P306D     | 2041 | No   | 2023.15           | rectal swab         |
| 144        | 72  | 6                            | female | deterioration | no                 | no                               | cardio-cerebrovascular disease | P144B     | 309  | No   | 2023.10           | rectal swab         |
| 140        | 67  | 14                           | male   | amelioration  | no                 | no                               | renal failure                  | P140A     | 3808 | No   | 2022.11           | nanopharyngeal swab |
| 042        | 28  | 30                           | male   | deterioration | no                 | yes                              | blood cancer                   | P042A     | 9    | Yes  | 2022.11.6         | nanopharyngeal swab |
|            |     |                              |        |               |                    |                                  |                                | P042C     | 9    | Yes  | 2022.11.7         | nanopharyngeal swab |
|            |     |                              |        |               |                    |                                  |                                | P049F     | 168  | No   | 2022.11.7         | rectal swab         |
| 083        | 28  | 30                           | male   | deterioration | no                 | yes                              | blood cancer                   | P083A     | 9    | Yes  | 2022.11.22        | nanopharyngeal swab |
|            |     | </                           |        |               |                    |                                  |                                |           |      |      |                   |                     |
